# Supplementary material for: Synthesis of spiro-lactam hydrazones by clay catalysis: toxicity, antioxidant, hypolipidemic and In silico assessments
Source: Royal Society of Chemistry journal article supplement (doi:10.1039/d6ra02313d), 2026-05-05
Supplement: d6ra02313d1.pdf [file d6ra02313d1.pdf]

## Synthesis of Spiro-Lactam Hydrazones by Clay Catalysis: Toxicity, Antioxidant, Hypolipidemic and *In-silico* assessments

Mohammed El Mesky<sup>1\*</sup>, Hicham Zgueni<sup>1</sup>, Ismail bouadid<sup>2</sup>, Jarin Tasnim<sup>3</sup>, Yassine Rhazi<sup>4</sup>, Md Mehedi Hasan<sup>3</sup>, Tanghourte Mohamed<sup>1</sup>, Adil Qabouche<sup>2</sup>, Mohammed Chalkha<sup>1</sup>, Na'il Saleh<sup>5</sup>, Driss Chebabe<sup>1</sup>, El Houssine Mabrouk<sup>1,4</sup> and Mohamed Eddouks<sup>2</sup>

<sup>1</sup>Laboratory of Materials Engineering for the Environment and Natural Resources, Faculty of Sciences and Techniques, University of Moulay Ismail of Meknes, B.P 509, Boutalamine, 52000, Errachidia, Morocco.

<sup>2</sup>Team of Ethnopharmacology and Pharmacognosy, Faculty of Sciences and Techniques Errachidia, Moulay Ismail University of Meknes, Errachidia, Morocco

<sup>5</sup>Department of applied chemistry and chemical Engineering, University of rajshahi, rajshahi Bangladesh.

<sup>4</sup>Laboratory of Engineering of Organometallic, Molecular Materials, Environment, and Innovative Pedagogy (LIMOMEPI), Faculty of Sciences Dhar EL Mahraz, Sidi Mohamed Ben Abdellah University, P.O. Box 1796 (Atlas), 30000 Fez, Morocco.

<sup>5</sup> Chemistry Department, College of Science, United Arab Emirates University P.O.Box 15551, Al Ain, United Arab Emirates

\*Corresponding authors' E-mails: El MESKY Mohammed [m.elmesky@edu.umi.ac.ma](mailto:m.elmesky@edu.umi.ac.ma)

## I. Chemical reagents and instruments

All chemicals, solvents and reagents used were of analytical grade and used without further purification. The chemicals were purchased from commercial suppliers: Fluorescein (98.0 %), hydrazine (99.0 %), Ethanol ( $\geq 99.5$  %), (99.8%), 3-Nitrobenzaldehyde (98.0 %), 4-nitrobenzaldehyde (98.0 %), Bromobutan (99.8%), ACN (99.8 %), Et<sub>3</sub>N ( $\geq 98.0$  %), ( $\geq 98.0$  %), Hexane ( $\geq 95$ %), Acetate d'ethyle ( $\geq 98$ %).

### 1. NMR <sup>1</sup>H, <sup>13</sup>C and HRMS Spectra of FH

**2-amino-3',6'-dihydroxyspiro[isindolin-3-one-1,9'-xanthene] FH** had a yield of Yield = 96.0%, a light off-white solid. *f.r* = 0.2 (hexane/ether) (2/1).

**<sup>1</sup>H NMR (300 MHz, DMSO-d<sub>6</sub>).**  $\delta$  (ppm) = 9.84 (s, 2H, NH<sub>2</sub> hydrazide), 9.02 (s, 1H, OH), 7.91–7.85 (m, 1H, ArH), 7.58 (dtd, *J*=21.4, 7.4, 1.2 Hz, 2H, ArH), 7.38 (dd, *J*=6.8, 3.0 Hz, 2H, ArH), 7.31 (dd, *J*=5.1, 1.9 Hz, 3H, ArH), 7.10 (dd, *J*=7.4, 1.2 Hz, 1H, ArH), 6.62 (d, *J*=2.3 Hz, 2H, ArH), 6.46 (d, *J*=8.6 Hz, 2H, ArH), 6.42 (dd, *J*=8.6, 2.4 Hz, 2H, ArH).

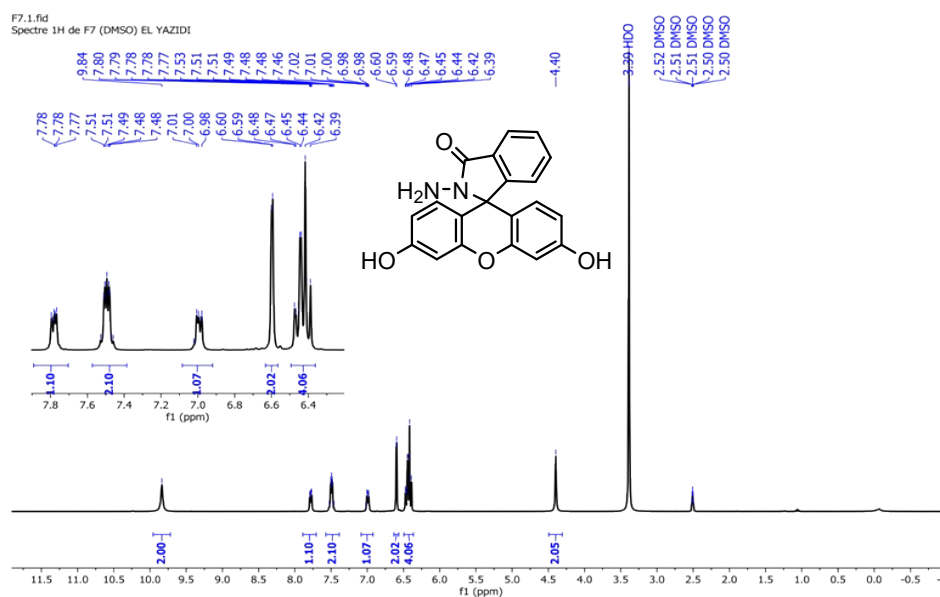

**Figure S 1.** <sup>1</sup>H NMR spectrum (300 MHz, DMSO-d<sub>6</sub>) of FH

**<sup>13</sup>C NMR (126 MHz, DMSO-d<sub>6</sub>):**  $\delta$  (ppm) = 164.17 (C=O), 159.13, 152.81, 150.91, 149.80, 135.04, 134.52, 130.89, 129.66, 129.65, 129.36, 128.54, 127.29, 124.36, 123.73, 112.85, 110.75, 103.01 (aromatic carbons), 65.93 (spiro carbon);

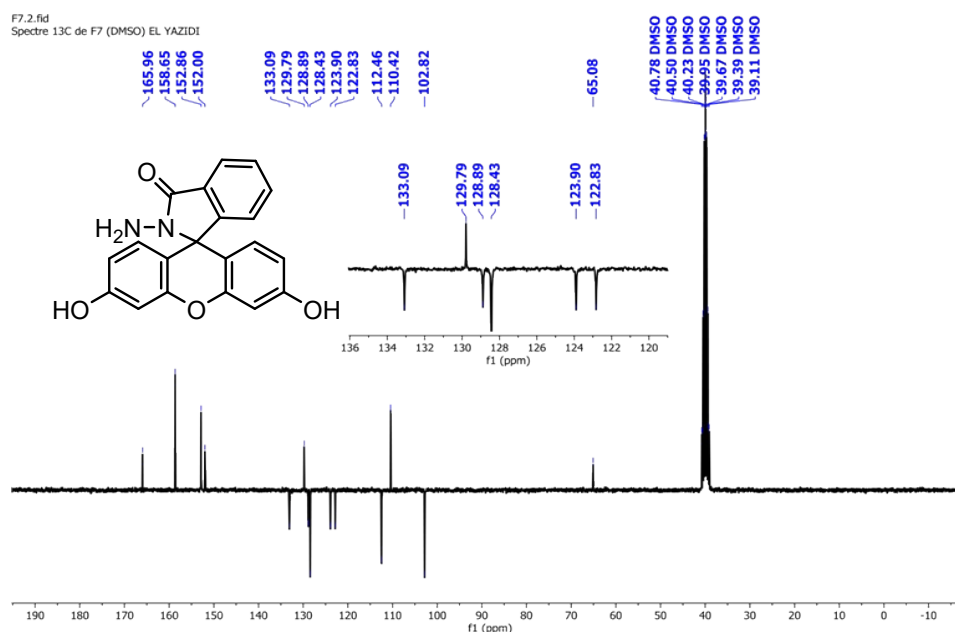

Figure S 2.  $^{13}\text{C}$  NMR spectrum (75MHz, DMSO-d<sub>6</sub>) of FH

HRMS (m/z). Calculated for  $\text{C}_{20}\text{H}_{14}\text{N}_2\text{O}_4$  346.10, found 345.08569,  $\Delta m = -0.01431$  Da

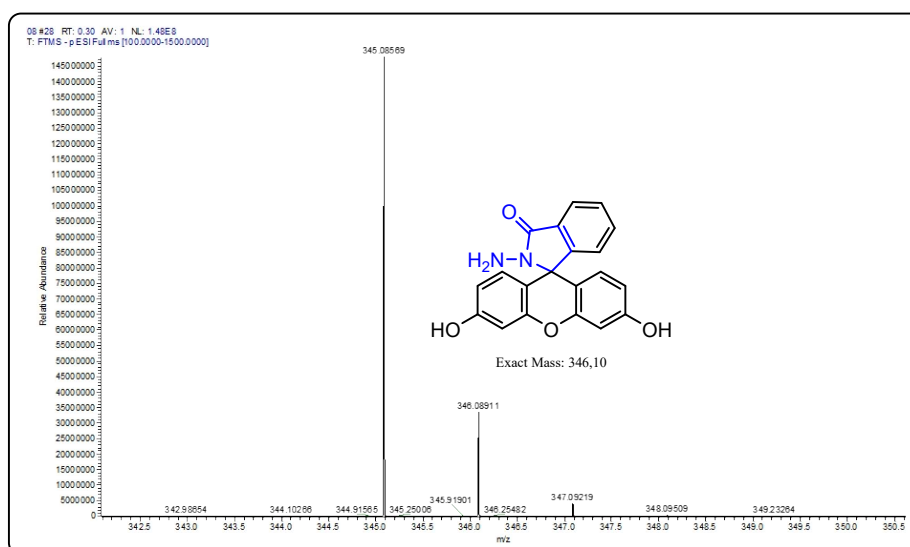

Figure S 3. Mass spectrum of FH

### 1. NMR $^1\text{H}$ , $^{13}\text{C}$ and HRMS Spectra of FHH1

2-((3-Nitrobenzylidene)amino)-3',6'-dihydroxyspiro[isindolin-3-one-1,9'-xanthene] FHH2 FHH1: had a yield of Yield = 94.3%; Melting point: 197-199 °C, yellow. f.r (Ac: Hex)(3:1) = 0.68

$^1\text{H}$  NMR (500 MHz, DMSO-d<sub>6</sub>).  $\delta$  9.87 (s, 2H), 9.13 (s, 1H), 8.22 (t, J = 2.0 Hz, 1H), 8.13 (dd, J = 8.0, 2.4 Hz, 1H), 7.91 (d, J = 7.5 Hz, 1H), 7.81 (d, J = 7.9 Hz, 1H), 7.67 – 7.54 (m, 3H), 7.13 (d, J = 7.5 Hz, 1H), 6.65 (d, J = 2.3 Hz, 2H), 6.50 – 6.39 (m, 4H).





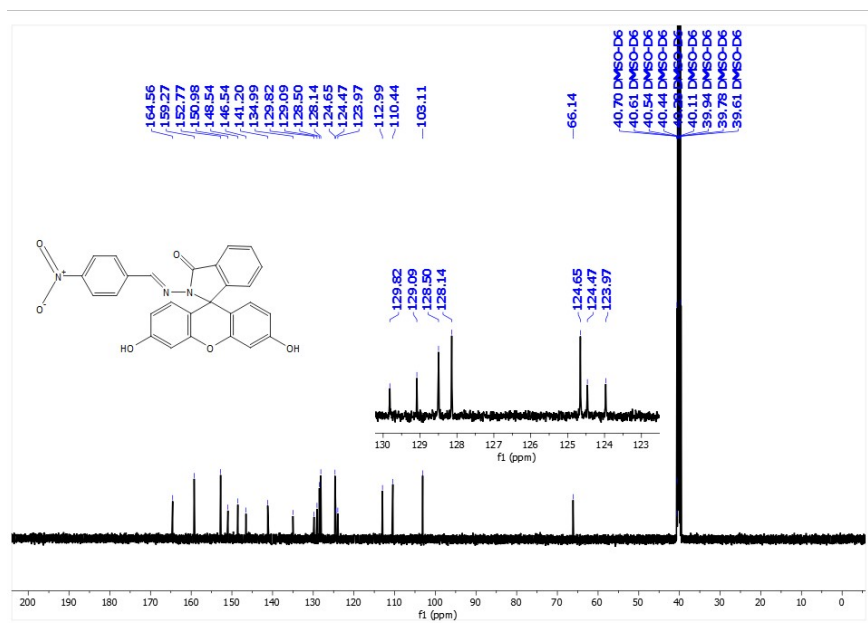

Figure S 7.  $^{13}\text{C}$  NMR spectrum (125 MHz, DMSO- $d_6$ ) of FHH1

HRMS ( $m/z$ ). Calculated for  $\text{C}_{27}\text{H}_{17}\text{N}_3\text{O}_6$  480.11174, found 480.11212,  $\Delta m = 1.002$  Da.

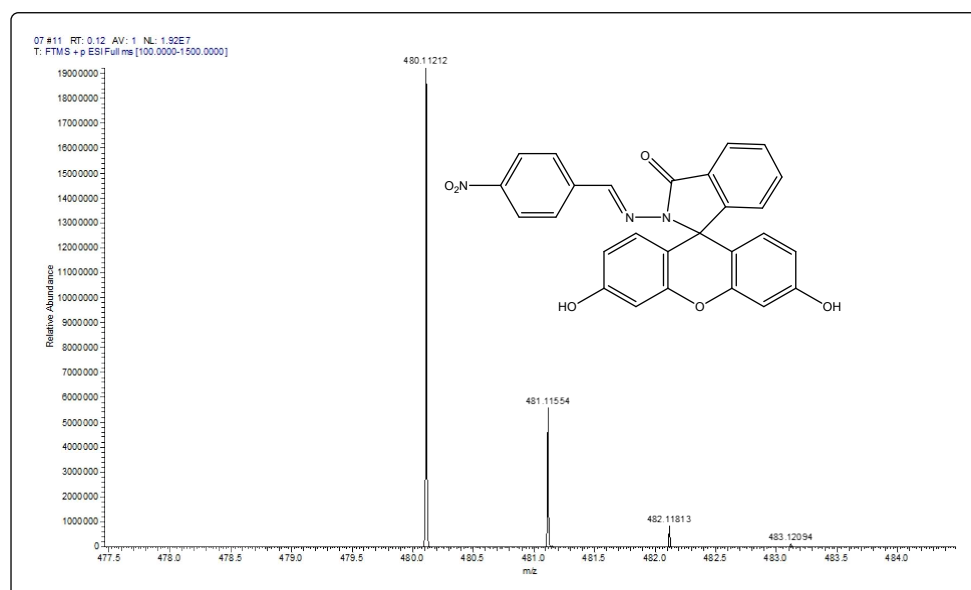

Figure S 8. Mass spectrum of FH

### 1. NMR $^1\text{H}$ , $^{13}\text{C}$ and HRMS Spectra of FHHA1

**3',6'-Dibutoxy-2-((3-nitrobenzylidene)amino)spiro[isoindolin-3-one-1,9'-xanthene] FHHA1**, had a yield of 95.0%; *M.p.*: 129-131 °C, yellow. *f.r.* (Ac:Hex)(4:1) = 0.63.

**<sup>1</sup>H NMR (500 MHz, DMSO-d<sub>6</sub>).** δ 9.24 (s, 1H), 8.21 (t, J = 1.9 Hz, 1H), 8.14 (ddd, J = 8.1, 2.4, 1.0 Hz, 1H), 7.96–7.90 (m, 1H), 7.81 (dt, J = 7.8, 1.3 Hz, 1H), 7.69–7.57 (m, 3H), 7.14 (dt, J = 7.6, 0.9 Hz, 1H), 6.85 (dd, J = 2.1, 0.8 Hz, 2H), 6.62 – 6.55 (m, 4H), 3.95 (t, J = 6.5 Hz, 4H), 1.67–1.60 (m, 4H), 1.37 (h, J = 7.4 Hz, 4H), 0.87 (t, J = 7.4 Hz, 6H).

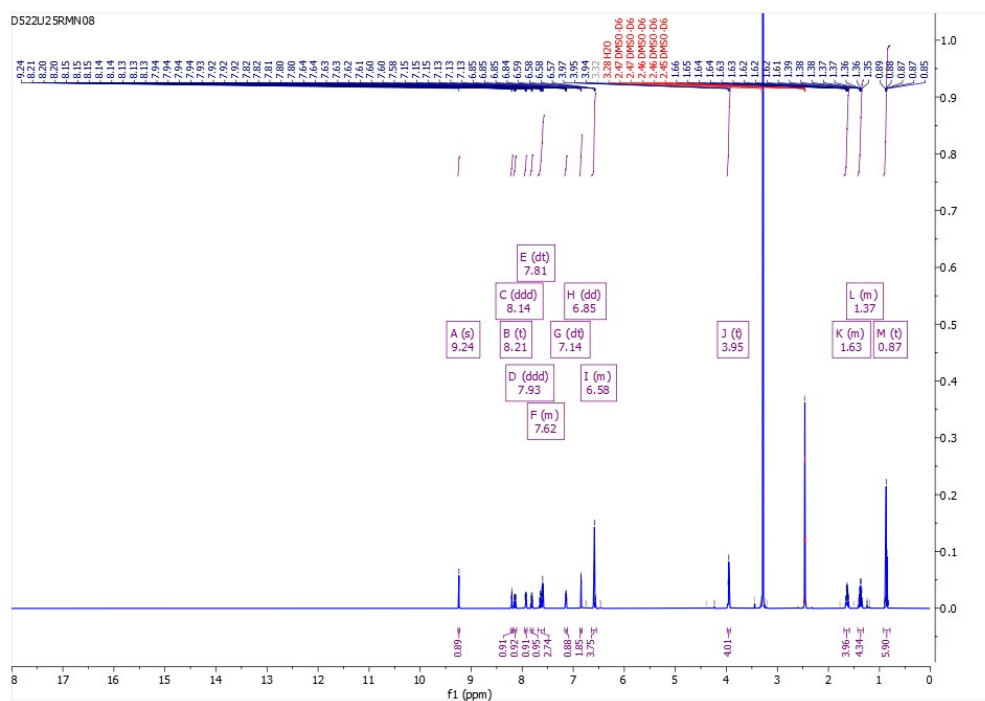

**Figure S 9.** <sup>1</sup>H NMR spectrum (500 MHz, DMSO-d<sub>6</sub>) of FHHA1

**<sup>13</sup>C NMR (126 MHz, DMSO-d<sub>6</sub>).** δ 164.53, 160.37, 152.9, 150.52, 148.75, 147.62, 134.97, 133.42, 131.01, 130.00, 128.50, 125.09, 124.48, 124.06, 121.34, 112.48, 111.92, 102.04, 68.13, 66.00, 31.15, 19.22, 14.12.

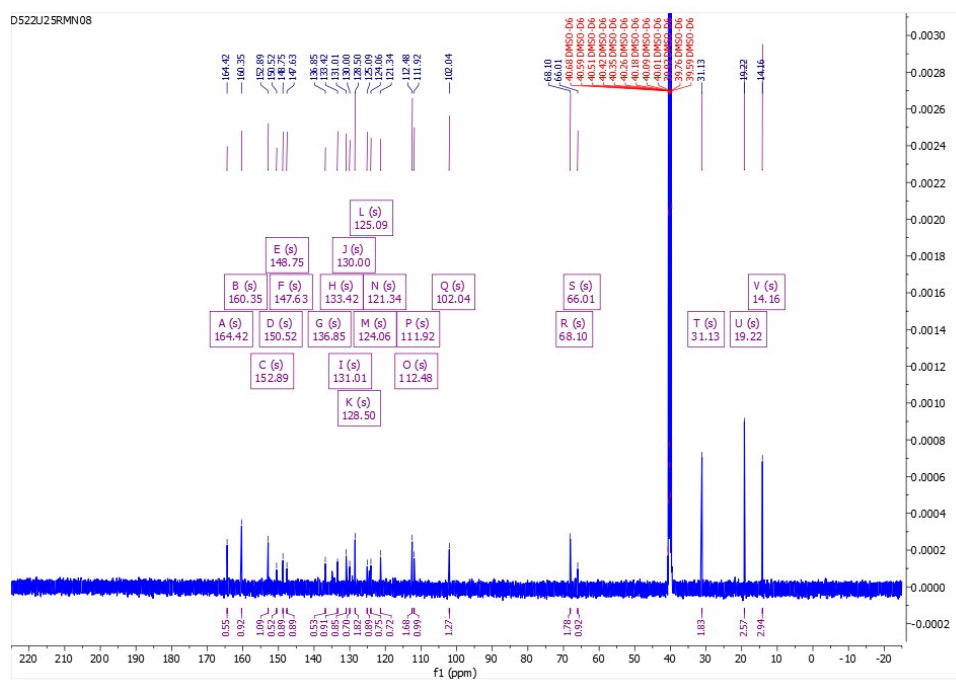

**Figure S 10.** <sup>13</sup>C NMR spectrum (125 MHz, DMSO-d<sub>6</sub>) of FHHA1  
*HRMS (m/z)*. Calculated for C<sub>35</sub>H<sub>33</sub>N<sub>3</sub>O<sub>6</sub> 592.23694, found 592.23609, Δ*m* = 0.996 Da.

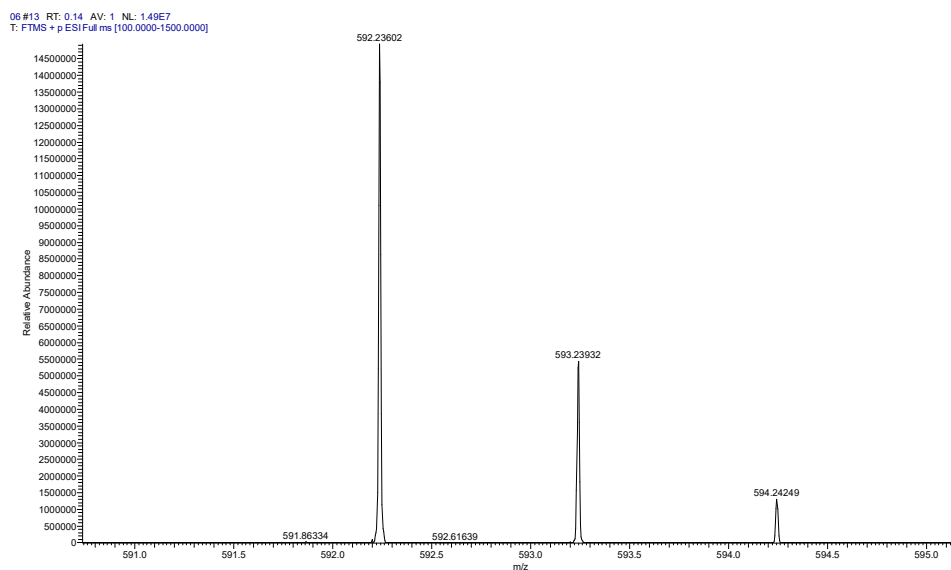

**Figure S 11.** Mass spectrum of FHHA1

### 1. NMR <sup>1</sup>H, <sup>13</sup>C HRMS and IR Spectra of FHHA2

**3',6'-Dibutoxy-2-((4-nitrobenzylidene)amino)spiro[isoindolin-3-one-1,9'-xanthene] FHHA2,**  
 had a yield of 96.0%; *M.p.*: 122–124 °C, yellow. *f.r.* (*Ac:Hex*)(4:1) = 0.65.

**$^1\text{H NMR}$  (500 MHz, DMSO- $d_6$ ).**  $\delta$  9.32 (s, 1H), 7.95–7.88 (m, 2H), 7.69–7.51 (m, 5H), 7.09 (dt,  $J$  = 7.5, 1.0 Hz, 1H), 6.83 (t,  $J$  = 1.4 Hz, 2H), 6.59 (d,  $J$  = 1.4 Hz, 4H), 3.95 (t,  $J$  = 6.5 Hz, 4H), 1.68–1.59 (m, 4H), 1.43–1.31 (m, 4H), 0.87 (t,  $J$  = 7.4 Hz, 6H).

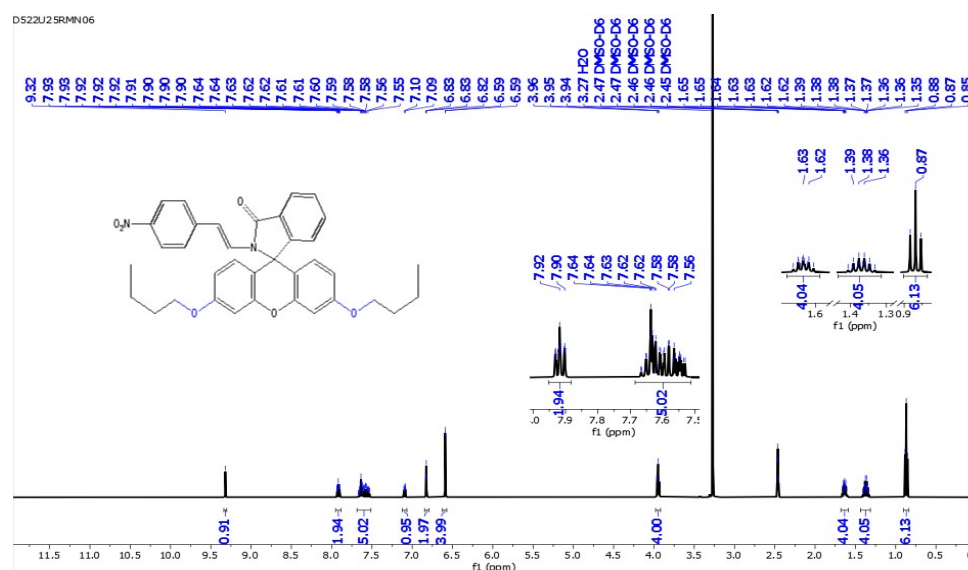

**Figure S 12.**  $^1\text{H NMR}$  spectrum (500 MHz, DMSO- $d_6$ ) of FHHA2

**$^{13}\text{C NMR}$  (126 MHz, DMSO- $d_6$ ).**  $\delta$  164.72, 160.39, 152.64, 148.64, 143.56, 135.08, 134.19, 131.46, 129.93, 129.12, 128.72, 128.43, 127.59, 125.18, 124.38, 124.07, 112.56, 111.51, 102.17, 68.12, 65.76, 31.11, 19.21, 14.15.

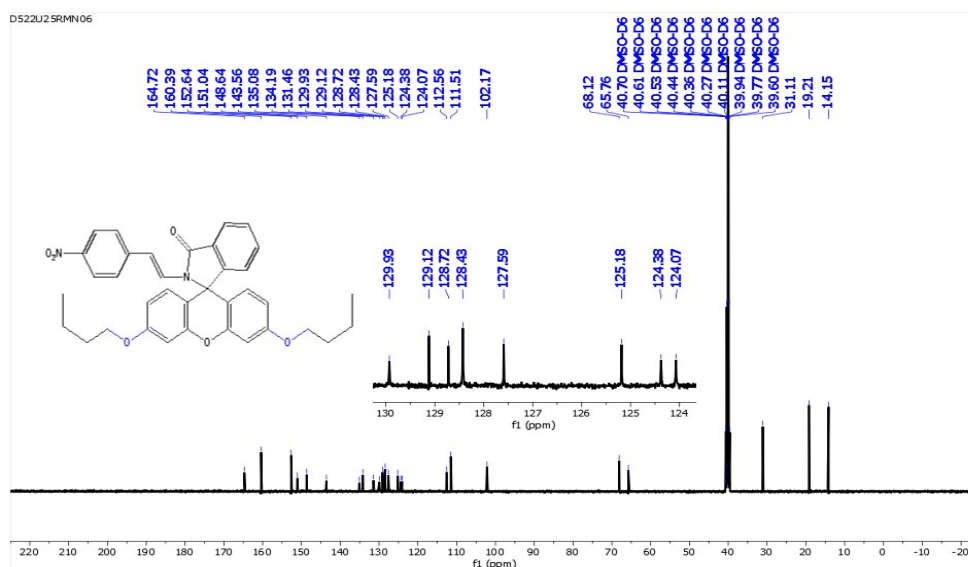

**Figure S 13.**  $^{13}\text{C NMR}$  spectrum (125 MHz, DMSO- $d_6$ ) of FHHA2

**HRMS ( $m/z$ ).** Calculated for  $\text{C}_{35}\text{H}_{33}\text{N}_3\text{O}_6$  592.23694, found 592.23609,  $\Delta m$  = 0.996 Da.

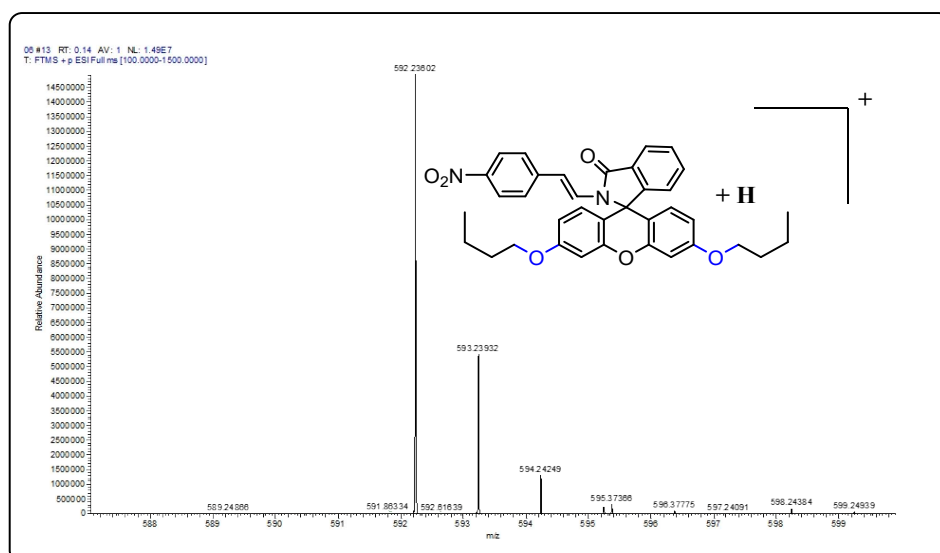

**Figure S 14.** Mass spectrum of FHHA2

**IR  $\tilde{\nu}$  ( $\text{cm}^{-1}$ ):** 2989–2872 ( $\nu\text{CH}_2$ ,  $\nu\text{CH}_3$ ); 3089–3020 ( $\nu\text{C-H}$  aromatic); 1702 ( $\nu\text{C=O}$  lactam/ester); 1614–1580 ( $\nu\text{C=C}$  aromatic); 1415 ( $\nu\text{NO}_2$ ); 1344 ( $\nu\text{C-N}$ ); 1301–1189 ( $\nu\text{C-O-C}$  ether); 1108–1014 ( $\nu\text{C-O}$ ,  $\nu\text{C-N}$ ); 873–684 ( $\delta\text{C-H}$  aromatic).

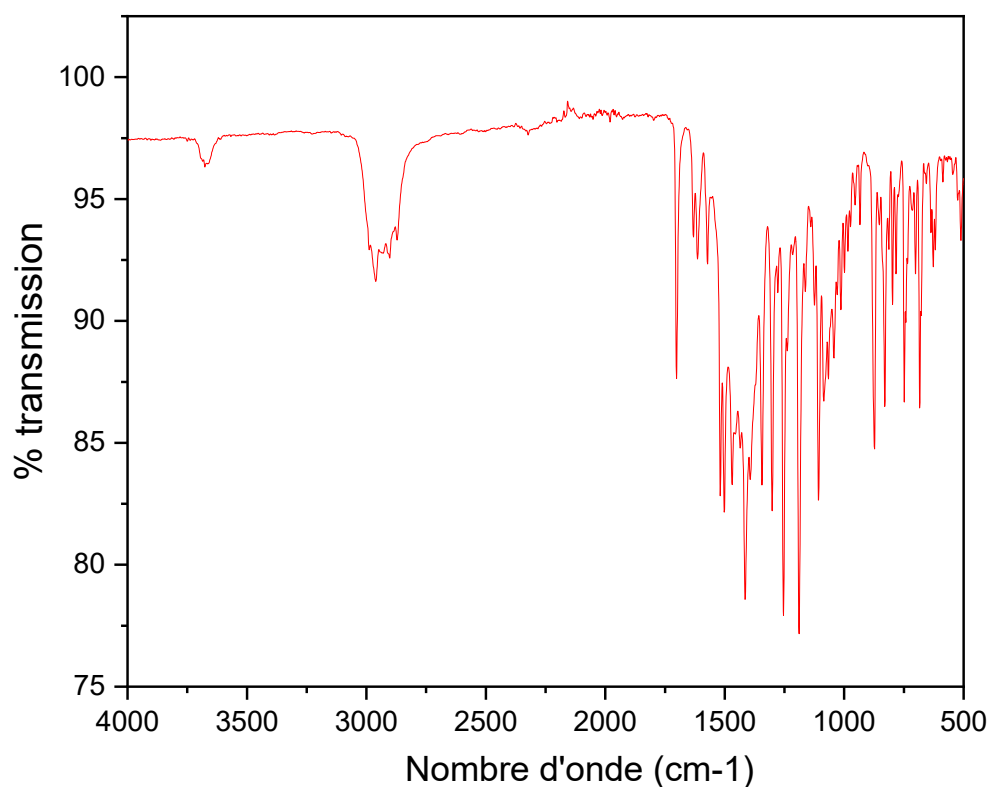

**Figure S 15.** IR spectrum of FHHA2
